# Supplementary material
Source: PubMed Central journal article supplement (PMC3791513)
Supplement: NIHMS517630-supplement-2_si_001.pdf [file NIHMS517630-supplement-2_si_001.pdf]

# Supporting Information

## **VirD - A Virion Display Array For Profiling Functional Membrane Proteins**

Shaohui Hu, Yingzhu Feng, Brandon Henson, Bochu Wang, Xiaofang Huang, Min Li,

Prashant Desai, Heng Zhu

This supporting information includes:

Figures S1-S2

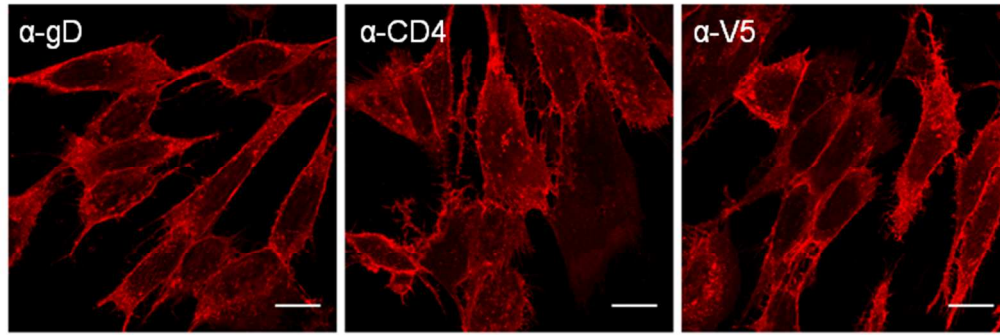

**Figure S1.** Confocal analysis of HFT cells infected with gB:CD4 showing intracellular distribution of gD and CD4. The CD4 staining was imaged using both anti-CD4 and anti-V5 antibodies and the results show a similar distribution of fluorescence within cells. Scale bars: 200 microns.

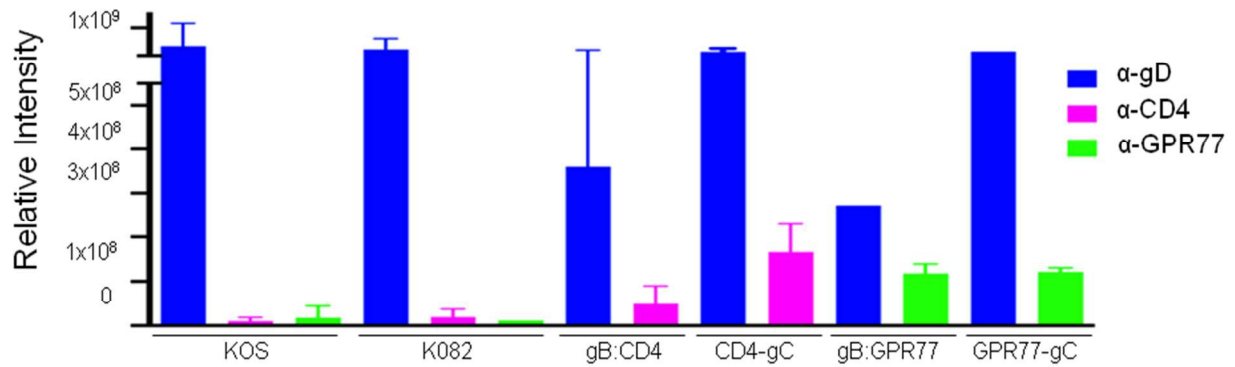

**Figure S2.** Wild-type HSV-1 (KOS), gB null (K082) and the CD4 and GPR77 containing virions were plated on plastic surfaces for analysis using ELISA methods. Antibodies to the ectodomain of CD4 and GPR77 were used and their binding to virions was measured using a chemiluminescent substrate. The data show specific binding of these antibodies to the virions displaying the respective human protein. This further demonstrates incorporation and correct display of these molecules in HSV virions.
